# Supplementary material for: Structural basis of PP2A activation by PTPA, an ATP-dependent activation chaperone
Source: PubMed Central journal article supplement — Cell Res. 2013 Oct 8;24(2):190–203. doi: 10.1038/cr.2013.138 (PMC3915903; doi:10.1038/cr.2013.138), 2013-10-08
Supplement: cr2013138x2.pdf [file cr2013138x2.pdf]

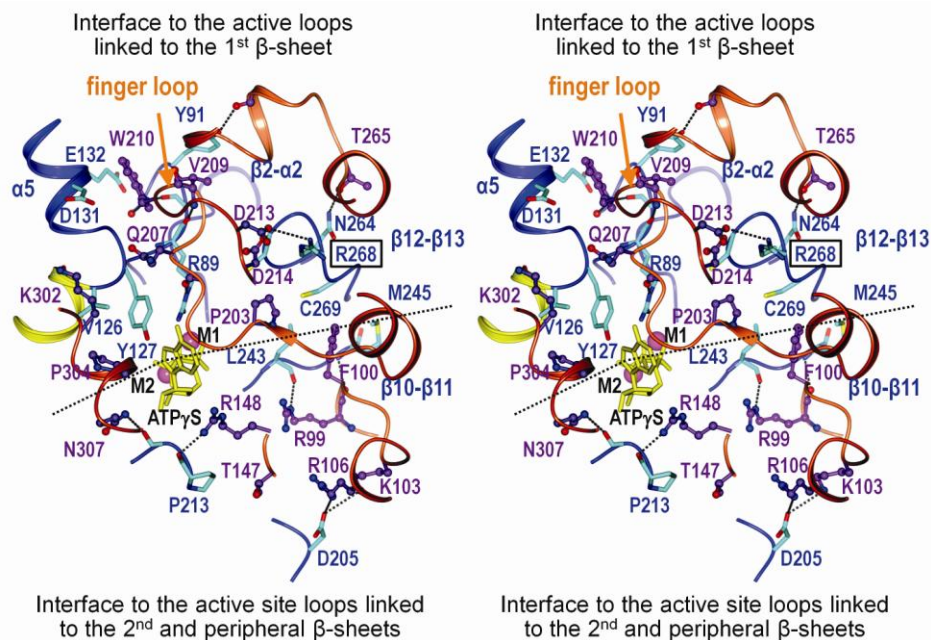

Fig. S2. A close-up stereo of the PP2Ac-PTPA interface surrounding the phosphatase active site. The active site is indicated by two catalytic metal ions (magenta spheres, at M1 and M2 positions) and ATP $\gamma$ S (yellow cylinder). PP2Ac and PTPA are in ribbon and colored blue and orange, respectively. Residues of PP2Ac and PTPA are shown in cylinder and ball-and-stick, and colored cyan and purple, respectively. Arg268 of PP2Ac is highlighted. H-bond interactions are indicated by black dashed lines. Note that mutations to PTPA residues, Phe100, Asp213, and Val209 disrupted PP2A-binding (Figure 6B). The dashed line divides the structural elements of PP2A at the interface with PTPA into two portions: the active site loops connected to the 1<sup>st</sup>  $\beta$ -sheet versus those connected to the 2<sup>nd</sup> and peripheral  $\beta$ -sheets.
