# Supplementary material for: Structural basis of PP2A activation by PTPA, an ATP-dependent activation chaperone
Source: PubMed Central journal article supplement — Cell Res. 2013 Oct 8;24(2):190–203. doi: 10.1038/cr.2013.138 (PMC3915903; doi:10.1038/cr.2013.138), 2013-10-08
Supplement: cr2013138x4.pdf [file cr2013138x4.pdf]

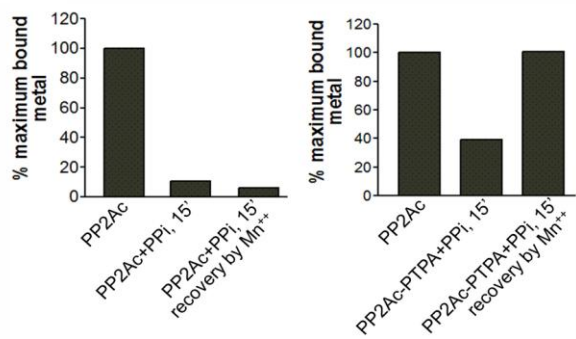

Fig. S4. Changes in the levels of Mn<sup>2+</sup> stably bound to PP2Ac (purified in the presence of 50  $\mu$ M MnCl<sub>2</sub>) after PPI treatment and re-activation by Mn<sup>2+</sup> in the presence (right) and absence (left) of PTPA.
