# Supplementary material for: Structural basis of PP2A activation by PTPA, an ATP-dependent activation chaperone
Source: PubMed Central journal article supplement — Cell Res. 2013 Oct 8;24(2):190–203. doi: 10.1038/cr.2013.138 (PMC3915903; doi:10.1038/cr.2013.138), 2013-10-08
Supplement: cr2013138x5.pdf [file cr2013138x5.pdf]

**A**

PP2A-PTPA metalloenzymes exchanged for different metal ions

| Metal ions incubated with PP2Ac              |                                                                           | Zn <sup>2+</sup> | Fe <sup>2+</sup> | Zn <sup>2+</sup> /Mn <sup>2+</sup> |
|----------------------------------------------|---------------------------------------------------------------------------|------------------|------------------|------------------------------------|
| pThr<br>(23°C)                               | K <sub>cat</sub> (min <sup>-1</sup> )                                     | 426±50           | 367±42           | 461±36                             |
|                                              | K <sub>m</sub> (μM)                                                       | 458±86           | 460±85           | 311±44                             |
|                                              | K <sub>cat</sub> /K <sub>m</sub><br>(min <sup>-1</sup> μM <sup>-1</sup> ) | 0.93             | 0.80             | 1.48                               |
| pNPP<br>(37°C)                               | K <sub>cat</sub> (min <sup>-1</sup> )                                     | 12.0±0.3         | 15.6±0.5         | 115±9                              |
|                                              | K <sub>m</sub> (μM)                                                       | 449±43           | 569±56           | 952±210                            |
|                                              | K <sub>cat</sub> /K <sub>m</sub><br>(min <sup>-1</sup> μM <sup>-1</sup> ) | 0.03             | 0.03             | 0.12                               |
| Relative specificity toward pThr versus pNPP |                                                                           | 31               | 27               | 12                                 |

**B**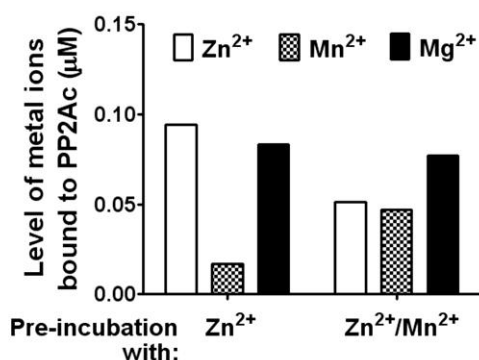

Fig. S5. Effect of different metal ions on phosphatase activity and specificity. (A)

Summary of K<sub>m</sub> and K<sub>cat</sub> of the PP2Ac-PTPA metalloenzymes toward a pThr peptide and a chemical mimic of phospho-Tyr, pNPP. The PP2Ac metalloenzymes had been exchanged for different metal ions followed by removal of free metal ions in the presence of PTPA. PP2Ac-PTPA complexes exchanged for Zn<sup>2+</sup>/Mn<sup>2+</sup> exhibited the highest nonspecific activity toward pNPP. (B) ICP-MS showed enrichment of metal ions in the PP2Ac-PTPA metalloenzymes after metal exchange as in (A). All PP2A samples retained a significant level of Mg<sup>2+</sup>. Co-incubation with Zn<sup>2+</sup>/Mn<sup>2+</sup> led to binding of similar levels of Zn<sup>2+</sup> and Mn<sup>2+</sup>.
