# Supplementary material for: Structural basis of PP2A activation by PTPA, an ATP-dependent activation chaperone
Source: PubMed Central journal article supplement — Cell Res. 2013 Oct 8;24(2):190–203. doi: 10.1038/cr.2013.138 (PMC3915903; doi:10.1038/cr.2013.138), 2013-10-08
Supplement: cr2013138x6.pdf [file cr2013138x6.pdf]

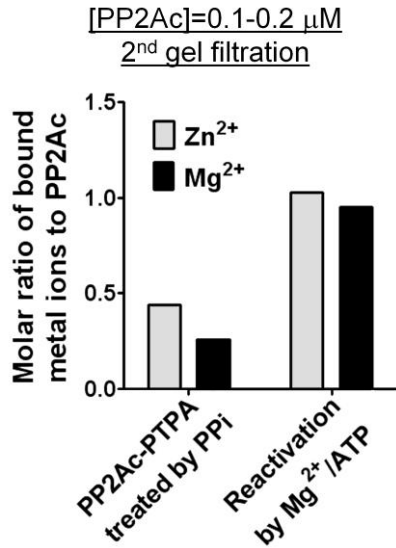

Fig. S6. Metal contents of PP2Ai-PTPA before and after activation by Mg<sup>2+</sup>/ATP. PP2Ac-PTPA exchanged for Zn<sup>2+</sup> was treated by PPI, followed by removal of free metal ions by gel filtration. The inactive complex was re-activated by Mg<sup>2+</sup>/ATP followed by addition of two molar excess of okadaic acid and removal of free Mg<sup>2+</sup>/ATP by gel filtration. The level of metal ions associated with PP2Ai-PTPA and the re-activated metalloenzyme bound to okadaic acid was determined by ICP-MS after replacement of buffer with “metal free” water by 2<sup>nd</sup> gel filtration chromatography. The increased Zn<sup>2+</sup> occupancy of the re-activated enzyme is likely due to binding of, or replacement of bound Mg<sup>2+</sup> by scavenging metal ions remained in the “metal free” solutions during activation and two rounds of gel filtration chromatography prior to ICP-MS analysis.
